# Supplementary material for: Holocene Evolution of Minor Mountain Lacustrine Basins in the Northern Apennines, Italy: The Lake Moo Case Study
Source: MDPI journal article supplement (doi:10.3390/geosciences12070272), 2022-07-05
Supplement: s1 [file s1]

## Supplement Material of

Structural and climatic control on Holocene sedimentation in minor mountain lacustrine basins: the Lake Moo case study (Northern Apennines, Italy)

Stefano Segadelli et al

### Chapter 1: Geoelectric survey details

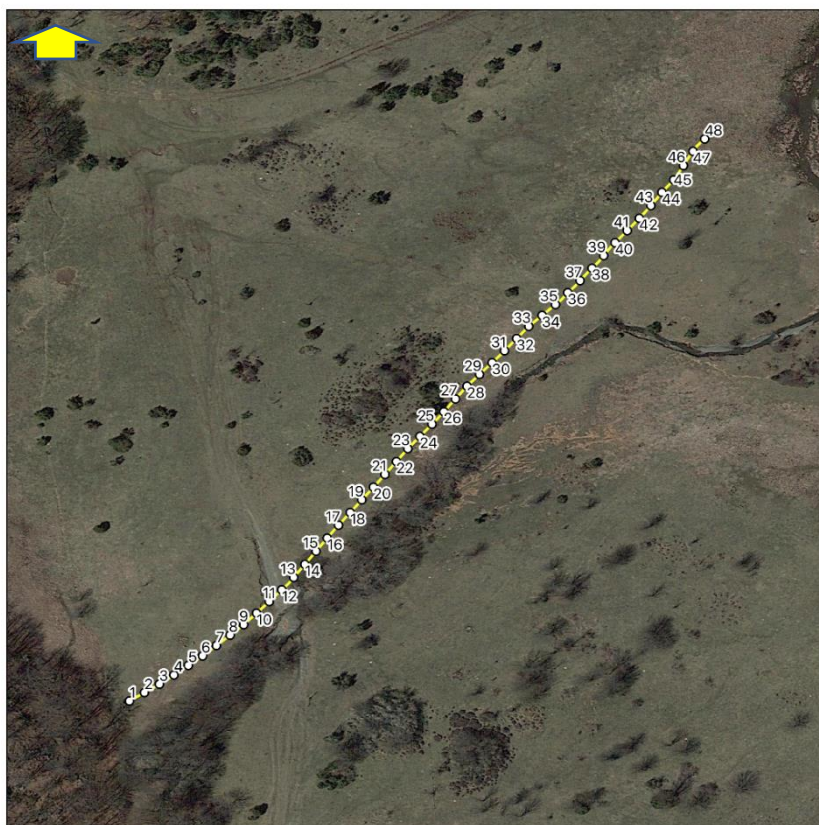

Figure S1. Tomographic profile location "ERT L1"

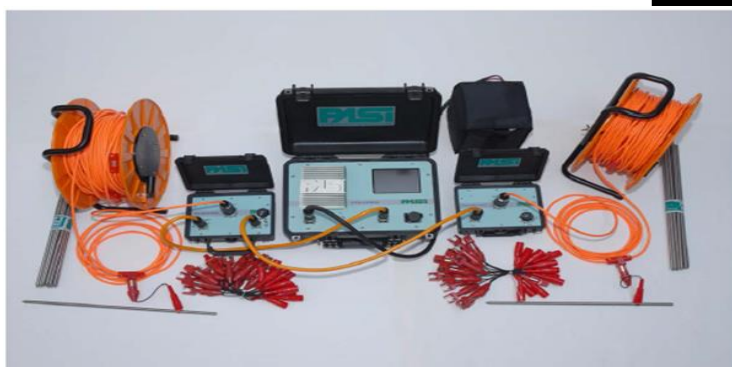

Figure S2. Georesistivity meter "Polares 2.0" of PASI Srl, employed for the geoelectric survey.

## ELECTRICAL IMAGING SYSTEM IN ALTERNATE CURRENT POLARES 2.0

[www.pasigeophysics.com](http://www.pasigeophysics.com)

### TECHNICAL SPECIFICATIONS:

|                                             |                                                                                                    |
|---------------------------------------------|----------------------------------------------------------------------------------------------------|
| CPU                                         | Ami 9 32 bit                                                                                       |
| Operating system                            | Linux                                                                                              |
| Display                                     | QVGA 5.7" with LED background lighting                                                             |
| Touch Screen                                | 4 wire resistive                                                                                   |
| Data storage                                | Solid state flash memory                                                                           |
| External data ports                         | USB host 1.1                                                                                       |
| Connectivity                                | USB key                                                                                            |
| Optional connectivity                       | Ethernet, Wi-Fi, Bluetooth, RS232, RS485, USB client, GPS, etc.                                    |
| GPS                                         | Integrated receiver for georeference of measures                                                   |
| DSP                                         | Freescale (Motorola) 120 MIPS                                                                      |
| Converters                                  | A/D 16 bit SAR and D/A to 16 bit                                                                   |
| Voltage measurement range                   | 300V, 30V, 3V                                                                                      |
| Current measurement range                   | 3A, 300mA, 30mA                                                                                    |
| Frequencies that can be generated           | 114Hz, 28.8Hz, 7.15Hz, 1.79Hz, 0.45Hz, 0.11Hz                                                      |
| Measurement soundness check                 | DC component, distortion, background noise, phase excess, module sigma, phase sigma                |
| Maximum number of spikes                    | Unlimited                                                                                          |
| Maximum number of scans per measurement     | > 40,000                                                                                           |
| Results that can be stored to memory (scan) | > 200,000                                                                                          |
| Peak voltage that can be generated          | 700 V <sub>pp</sub>                                                                                |
| Peak current that can be generated          | 2000 mA                                                                                            |
| Peak power output that can be generated     | 200 W                                                                                              |
| Thermal protections                         | Heatsink and inside case alarms and system shut-down                                               |
| Power supply                                | 8.5V= / 15V= lead or lithium batteries, 30 A internal fuse, protection against polarity inversions |
| Operating temperature                       | -20°C / 80 °C outside                                                                              |
| Dimensions and weight                       | 410x390x170mm; 6kg                                                                                 |

For additional technical/commercial informations : [sales@pasirsl.it](mailto:sales@pasirsl.it)

**Figure S3.** Technical specifications of the "POLARES 2.0" used for the geoelectric survey.

Figures d to n are the technical details and calculations related to each acquisition.

The main graphs refer to, respectively:

- Terrain resistivity model obtained through the inversion process;
- Terrain chargeability obtained through the inversion process;
- Comparison between the resistivity and chargeability models;

The topographic correction of the model was carried out to have the electro stratigraphic section adhering to the local morphology.



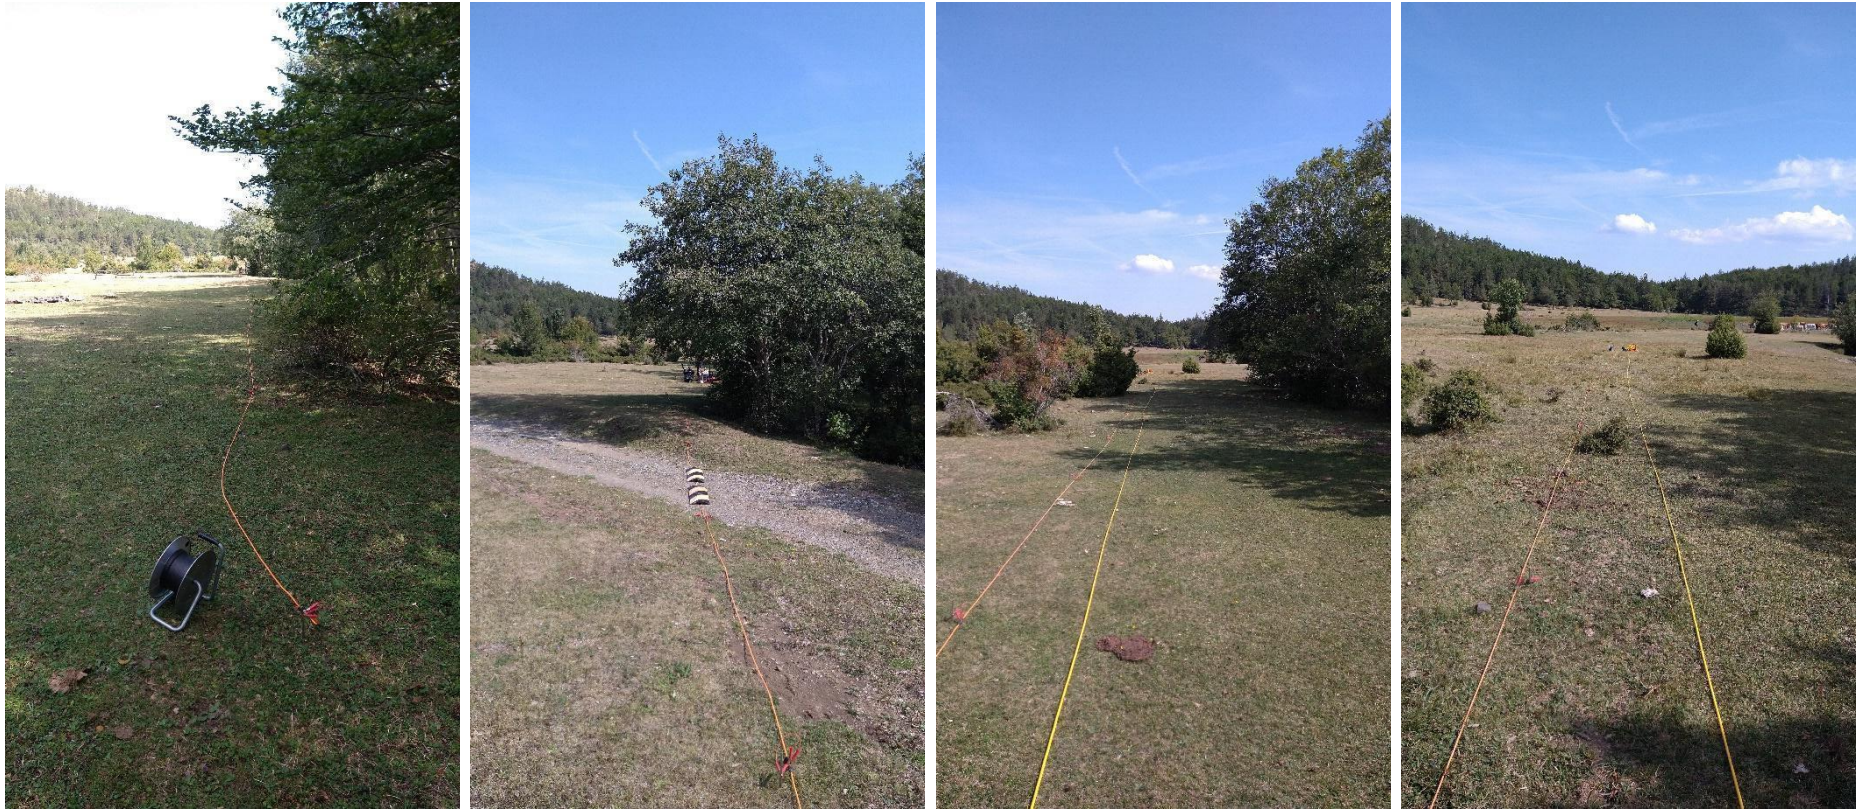

**Figure S4.** Documentation of fieldwork activities.



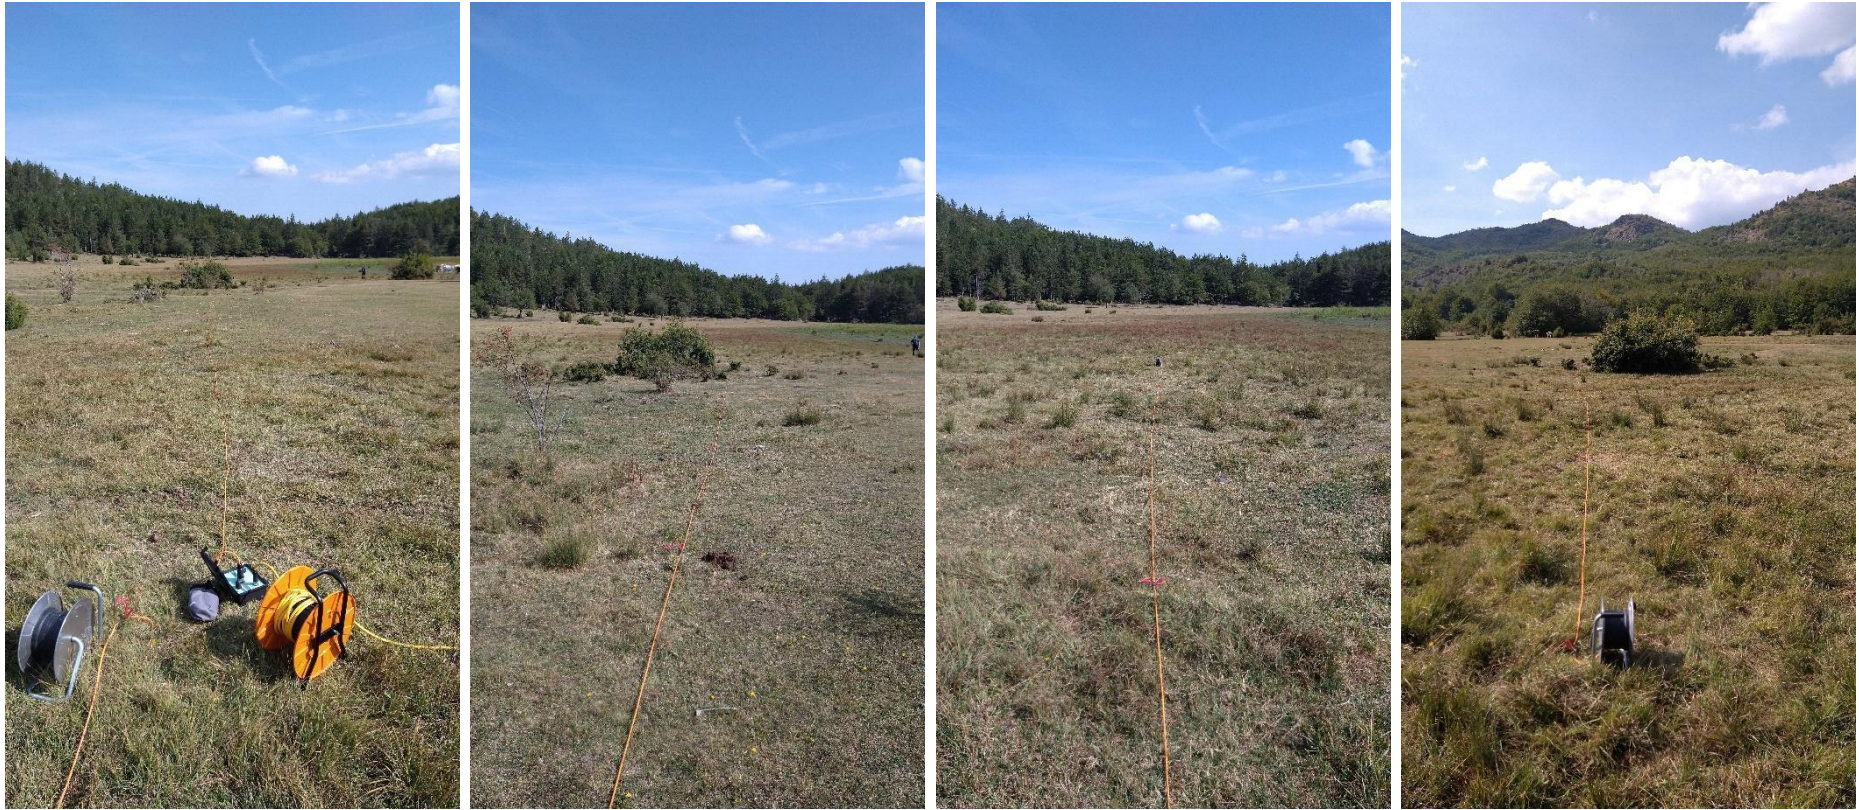

**Figure S5.** Documentation of fieldwork activities

**Table S1.** Data Summary

| SUMMARY DATA - ERT L1    |                                                        |                 |
|--------------------------|--------------------------------------------------------|-----------------|
| Fields Operator          | Dr. Geol. Gambini Stefano;<br>Dr. Geol. Gabriele Oppò; |                 |
| Length                   | 235 m                                                  |                 |
| Number of electrodes     | 48                                                     |                 |
| Electrode spacing        | 5                                                      |                 |
| Electrodic configuration | Wenner - <u>Schlumberger</u>                           |                 |
| Number of readings       | 61                                                     |                 |
| Number of iterations     | 1314/1433                                              |                 |
| Model blocks             | 5                                                      |                 |
| Model layers             | 368                                                    |                 |
| Length                   | 12                                                     |                 |
| RESISTIVITY              |                                                        |                 |
| Resistivity range        | Ωm (Ohm x meter)<br>Min:<br>Max:                       | 15,77<br>609,58 |
| Error                    | 2,11%                                                  |                 |
| CHARGEABILITY            |                                                        |                 |
| Chargeability range      | msec<br>Min:<br>Max                                    | 0,00<br>1,54    |
| Error                    | 0,08%                                                  |                 |

SW

NE

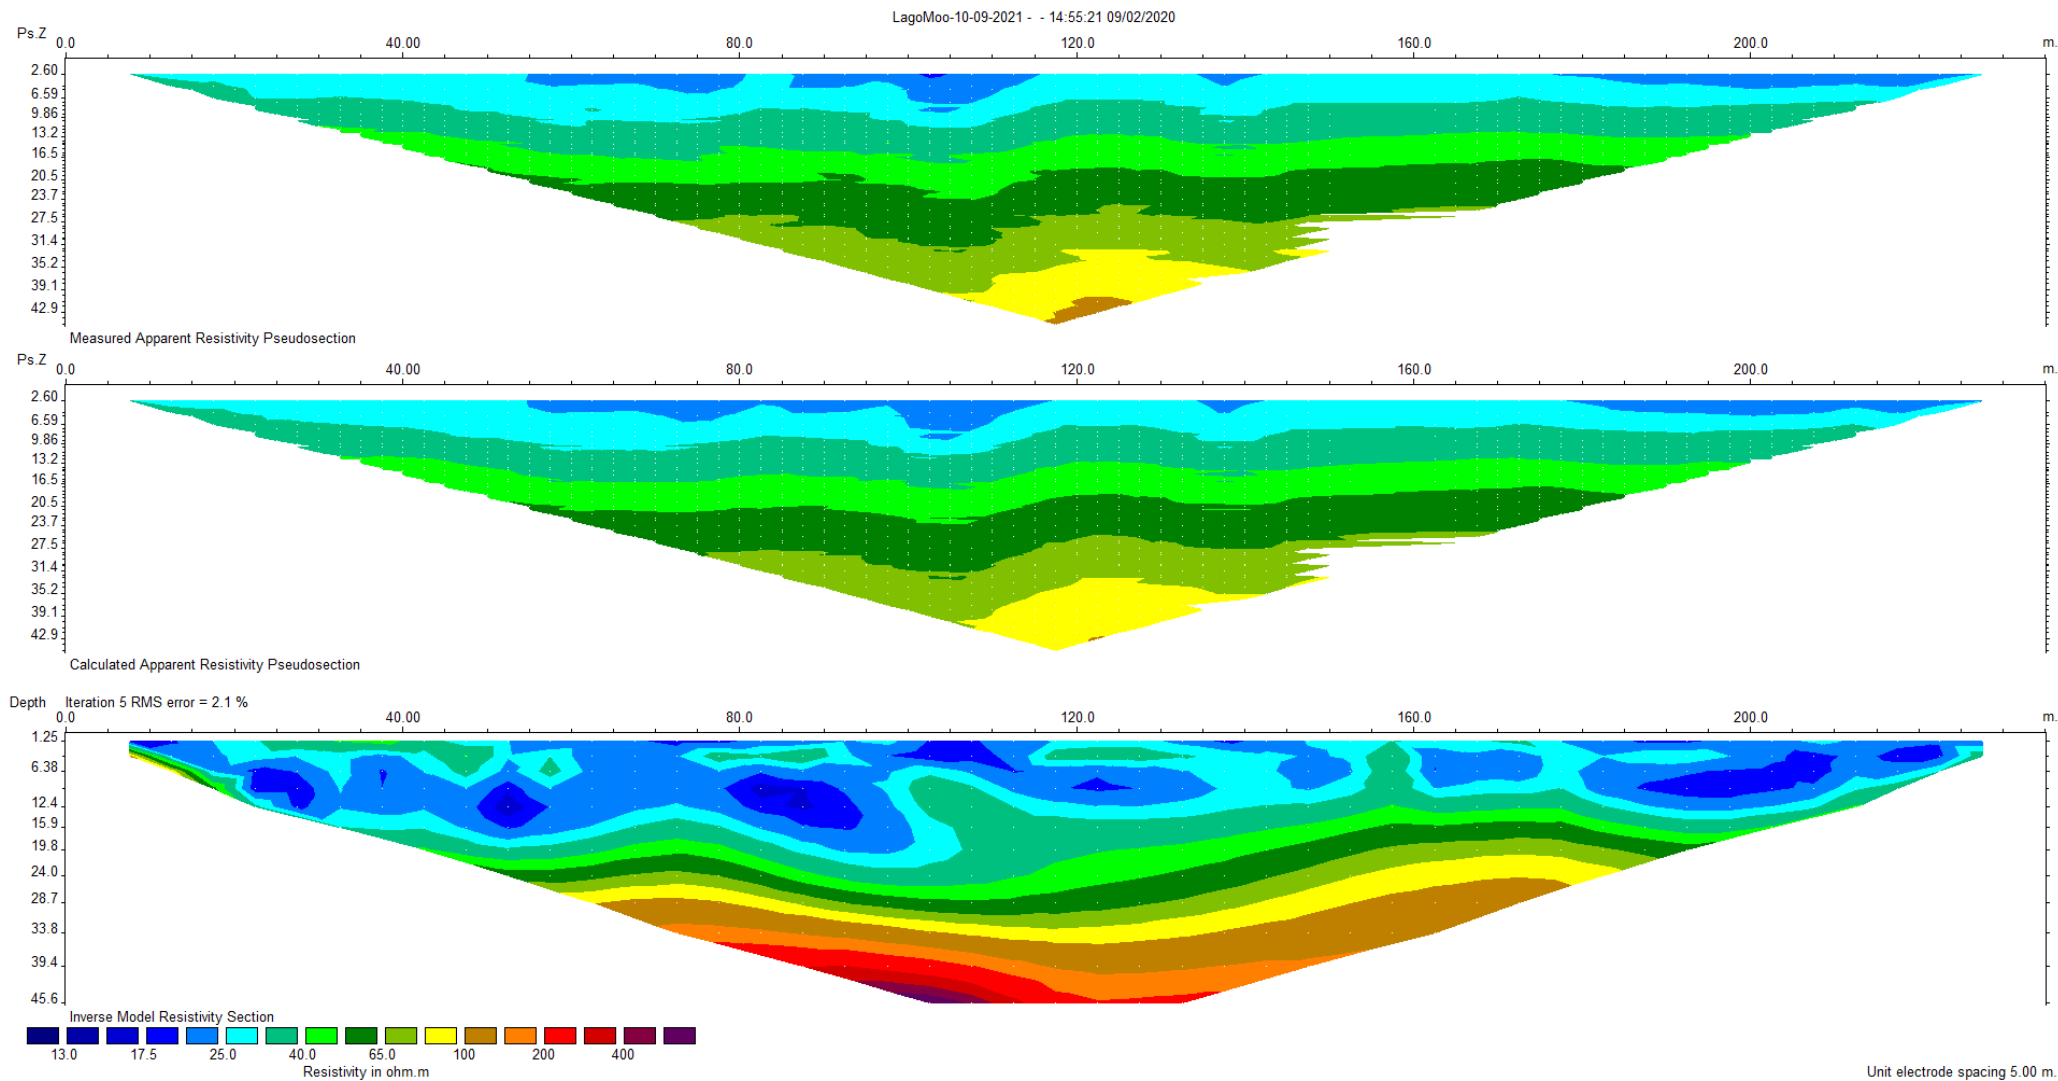

Figure S6. ERT L1 Resistivity

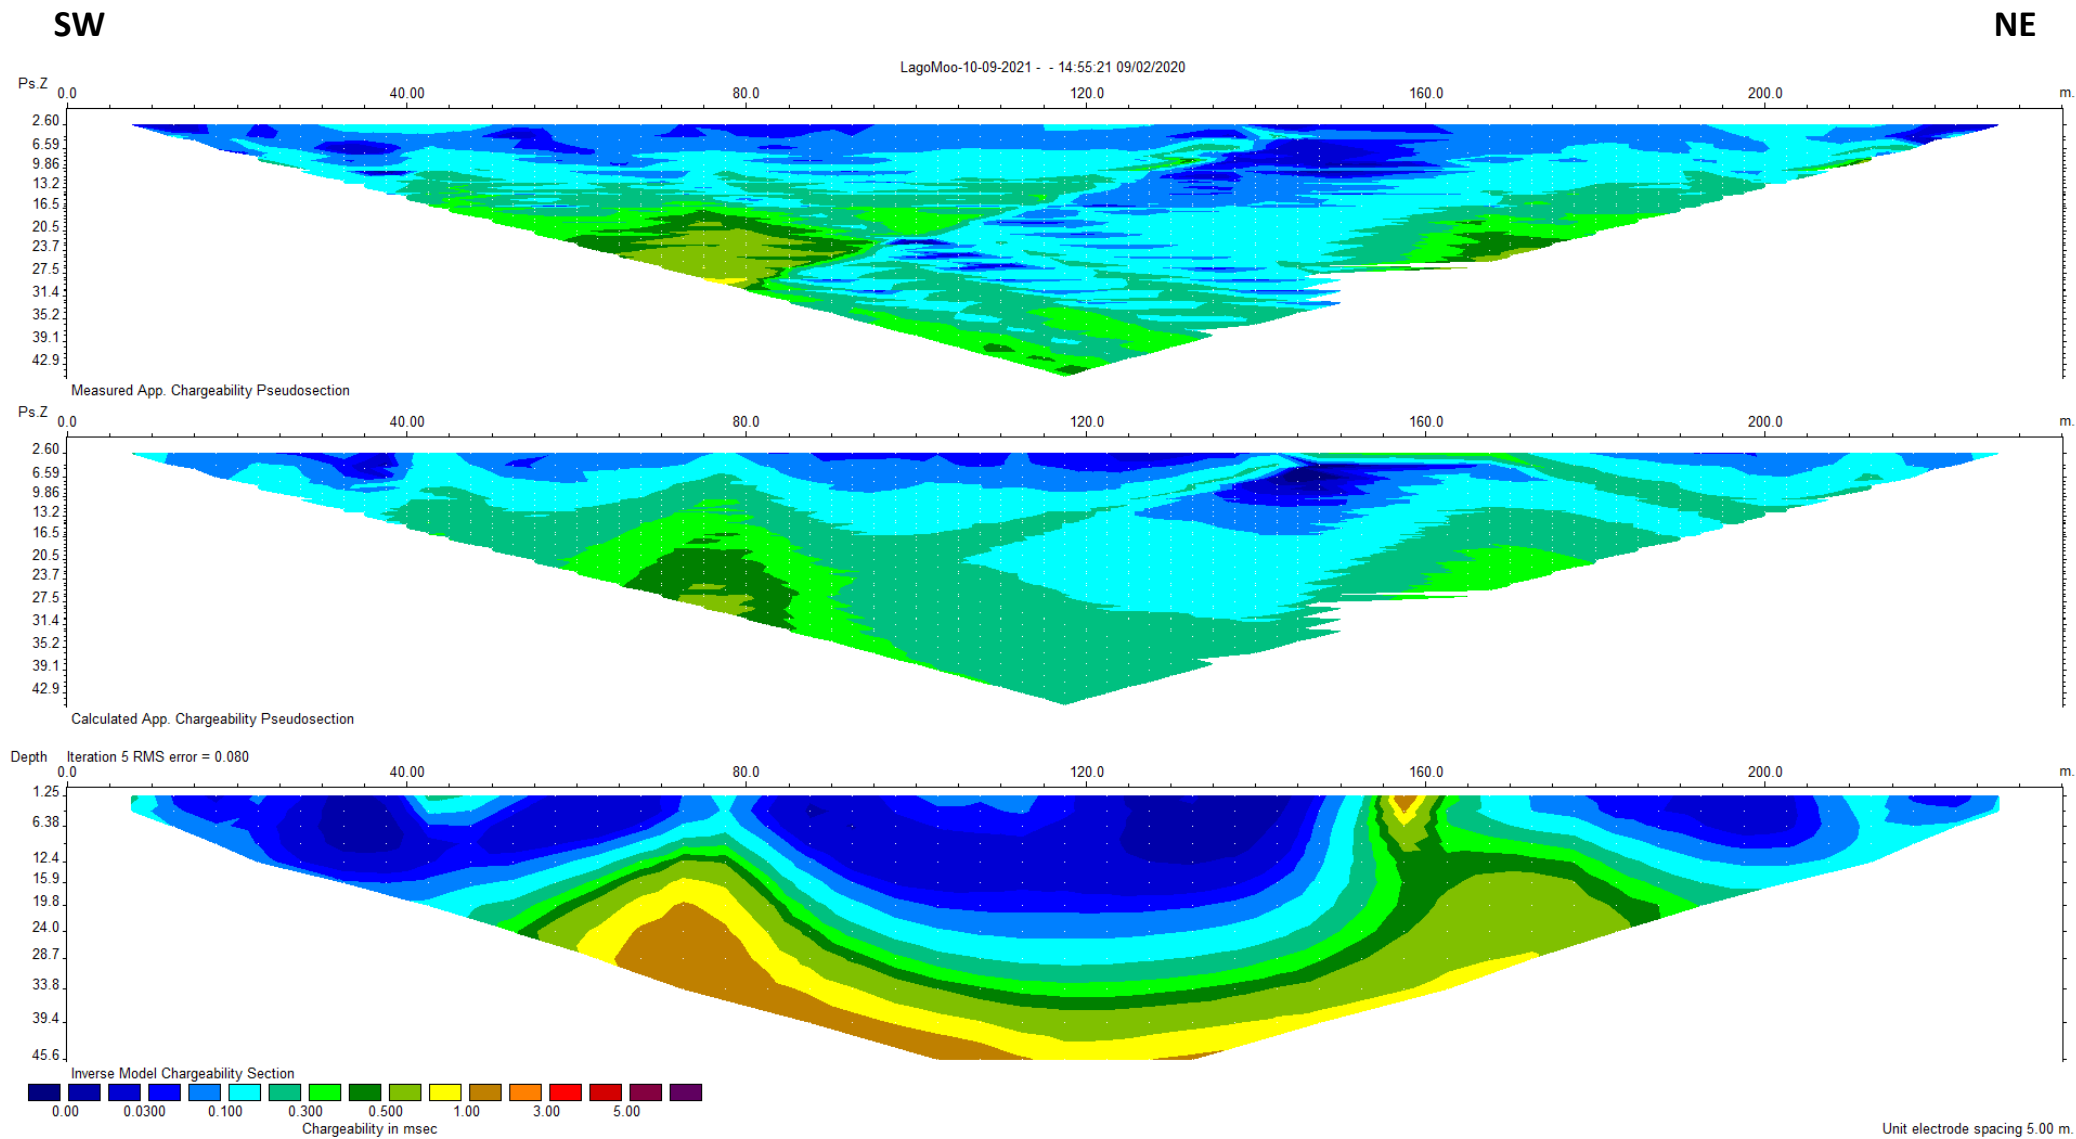

**Figure S7.** ERT L1 Chargeability

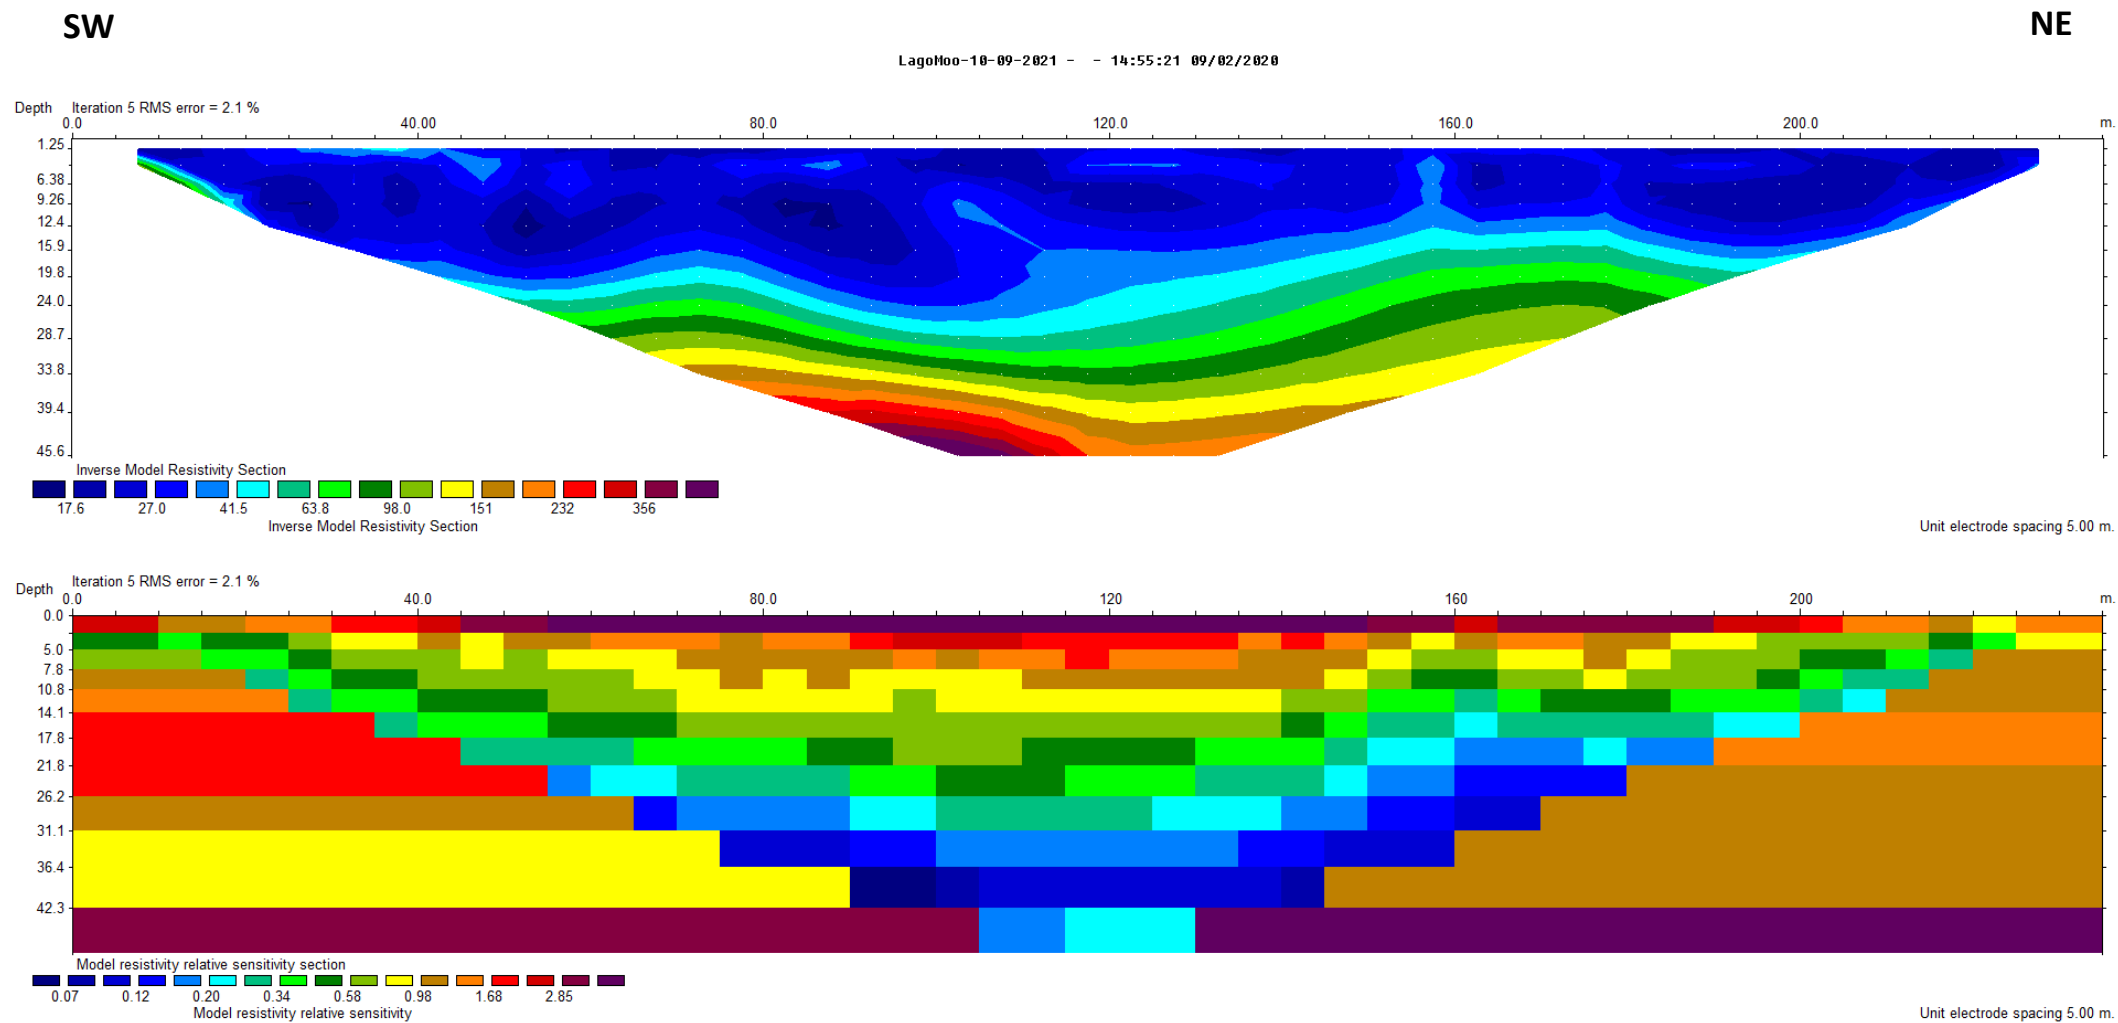

**Figure S8.** ERT L1 Comparison between resistivity (top) and block sensitivity (bottom)



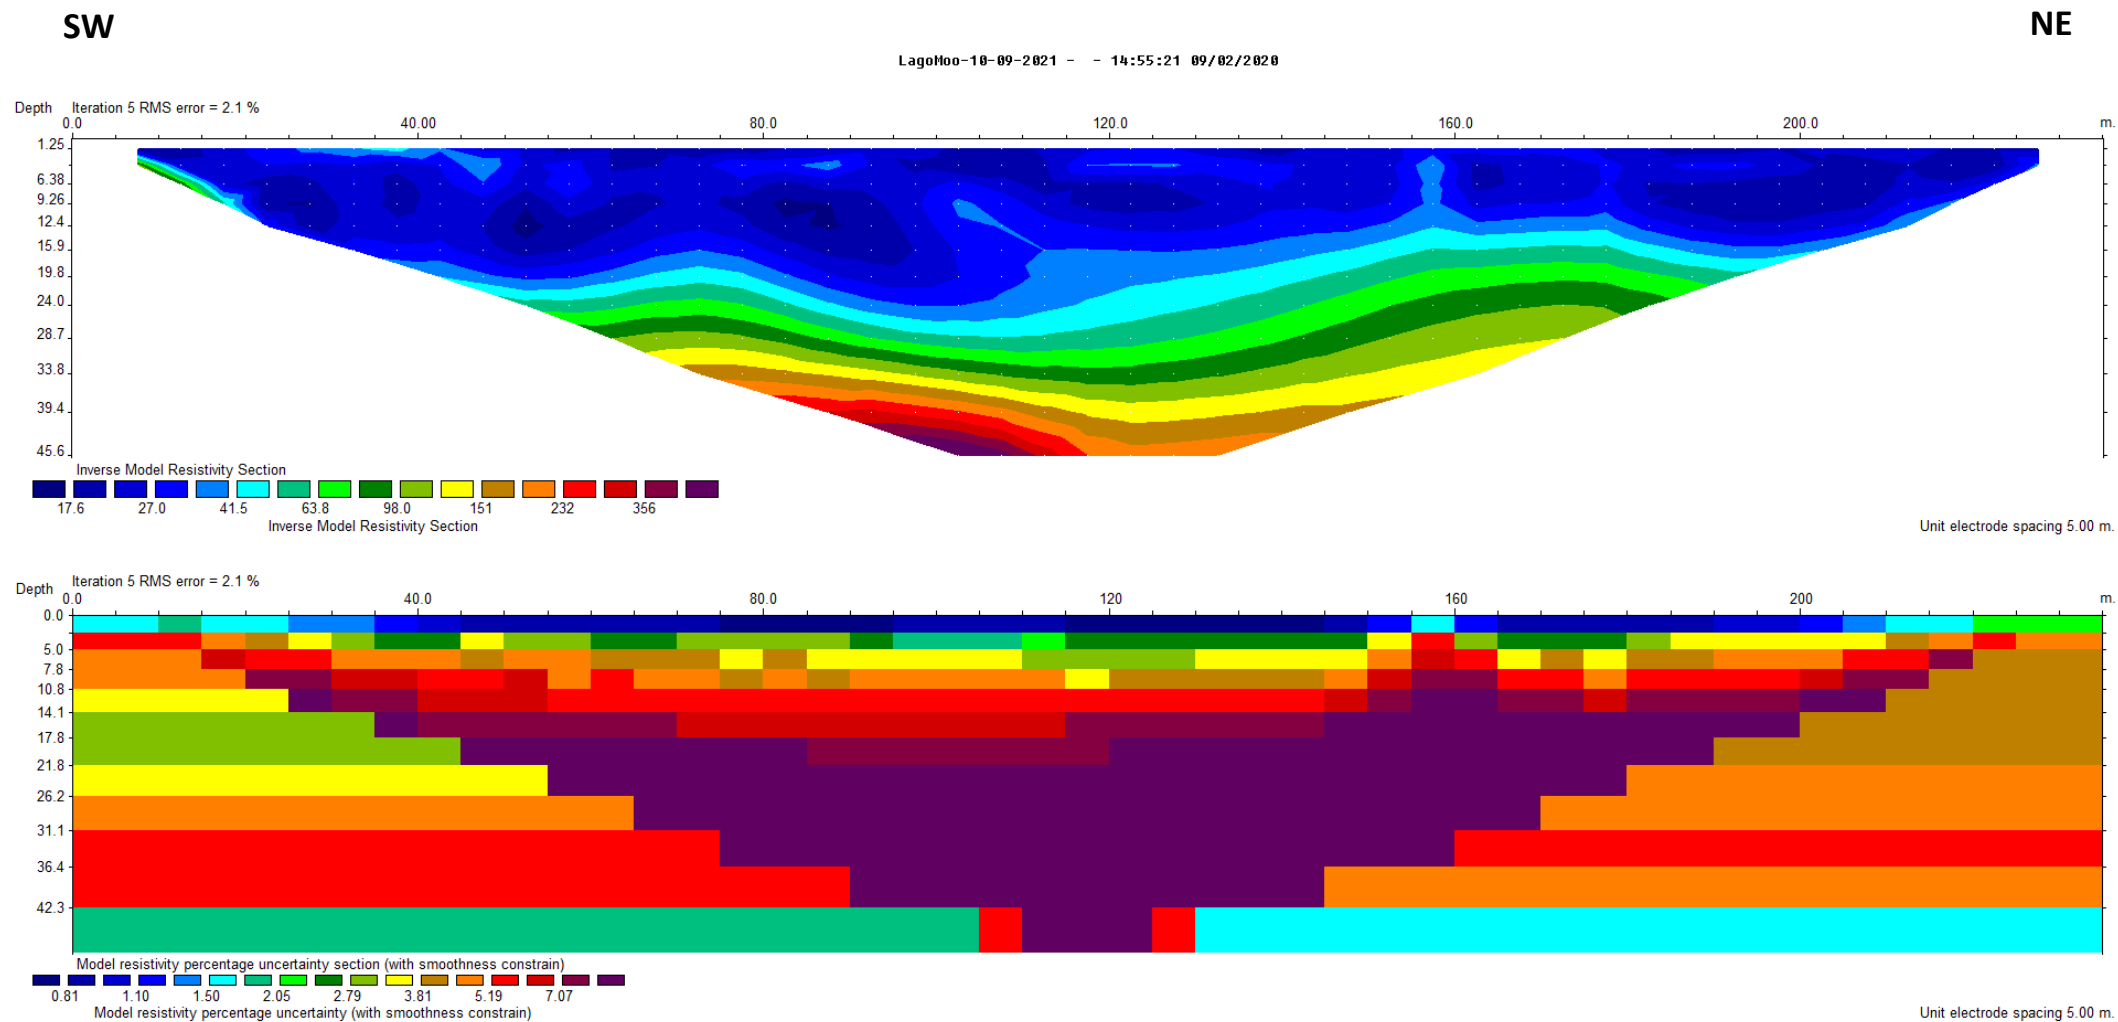

**Figure S9.** ERT L1 Comparison between resistivity (top) and block uncertainty (bottom)

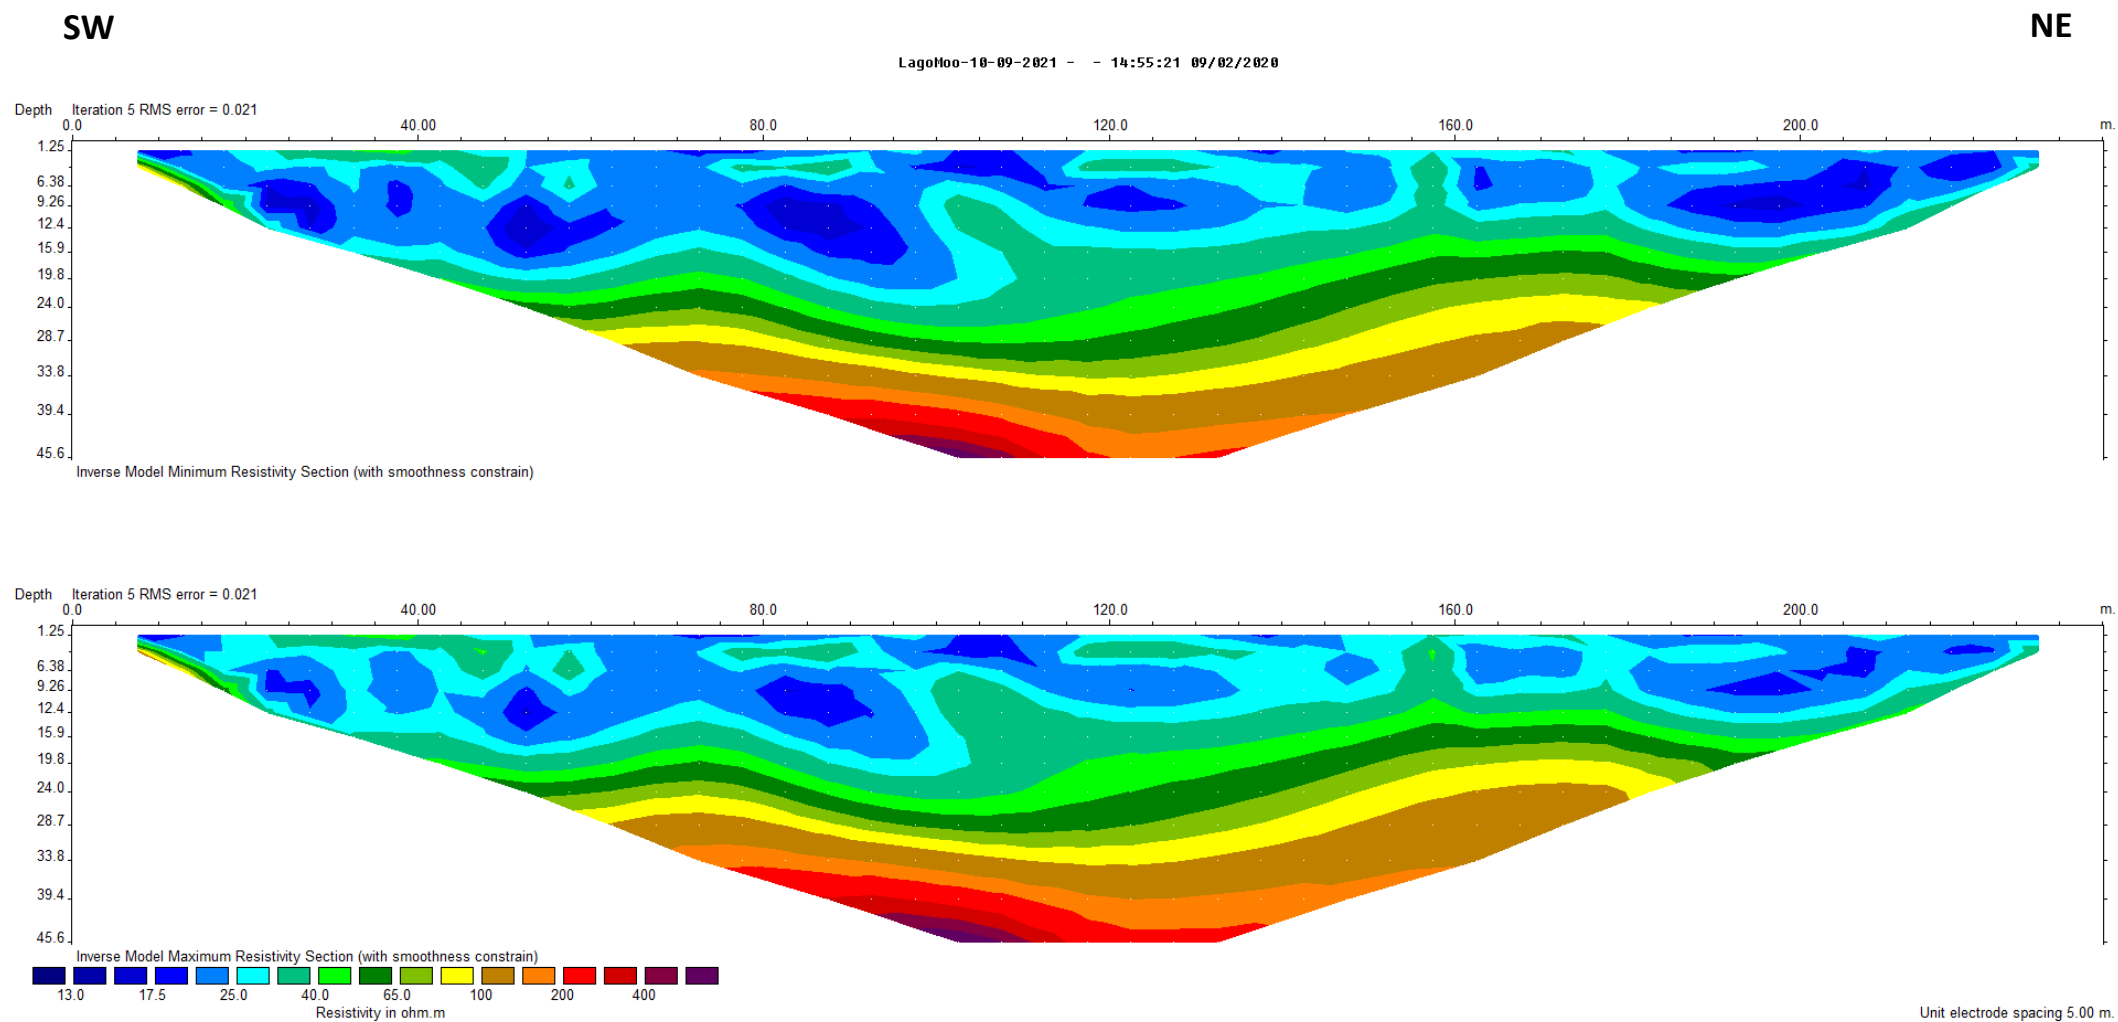

**Figure S10.** ERT L1 Comparison between min and max resistivity models

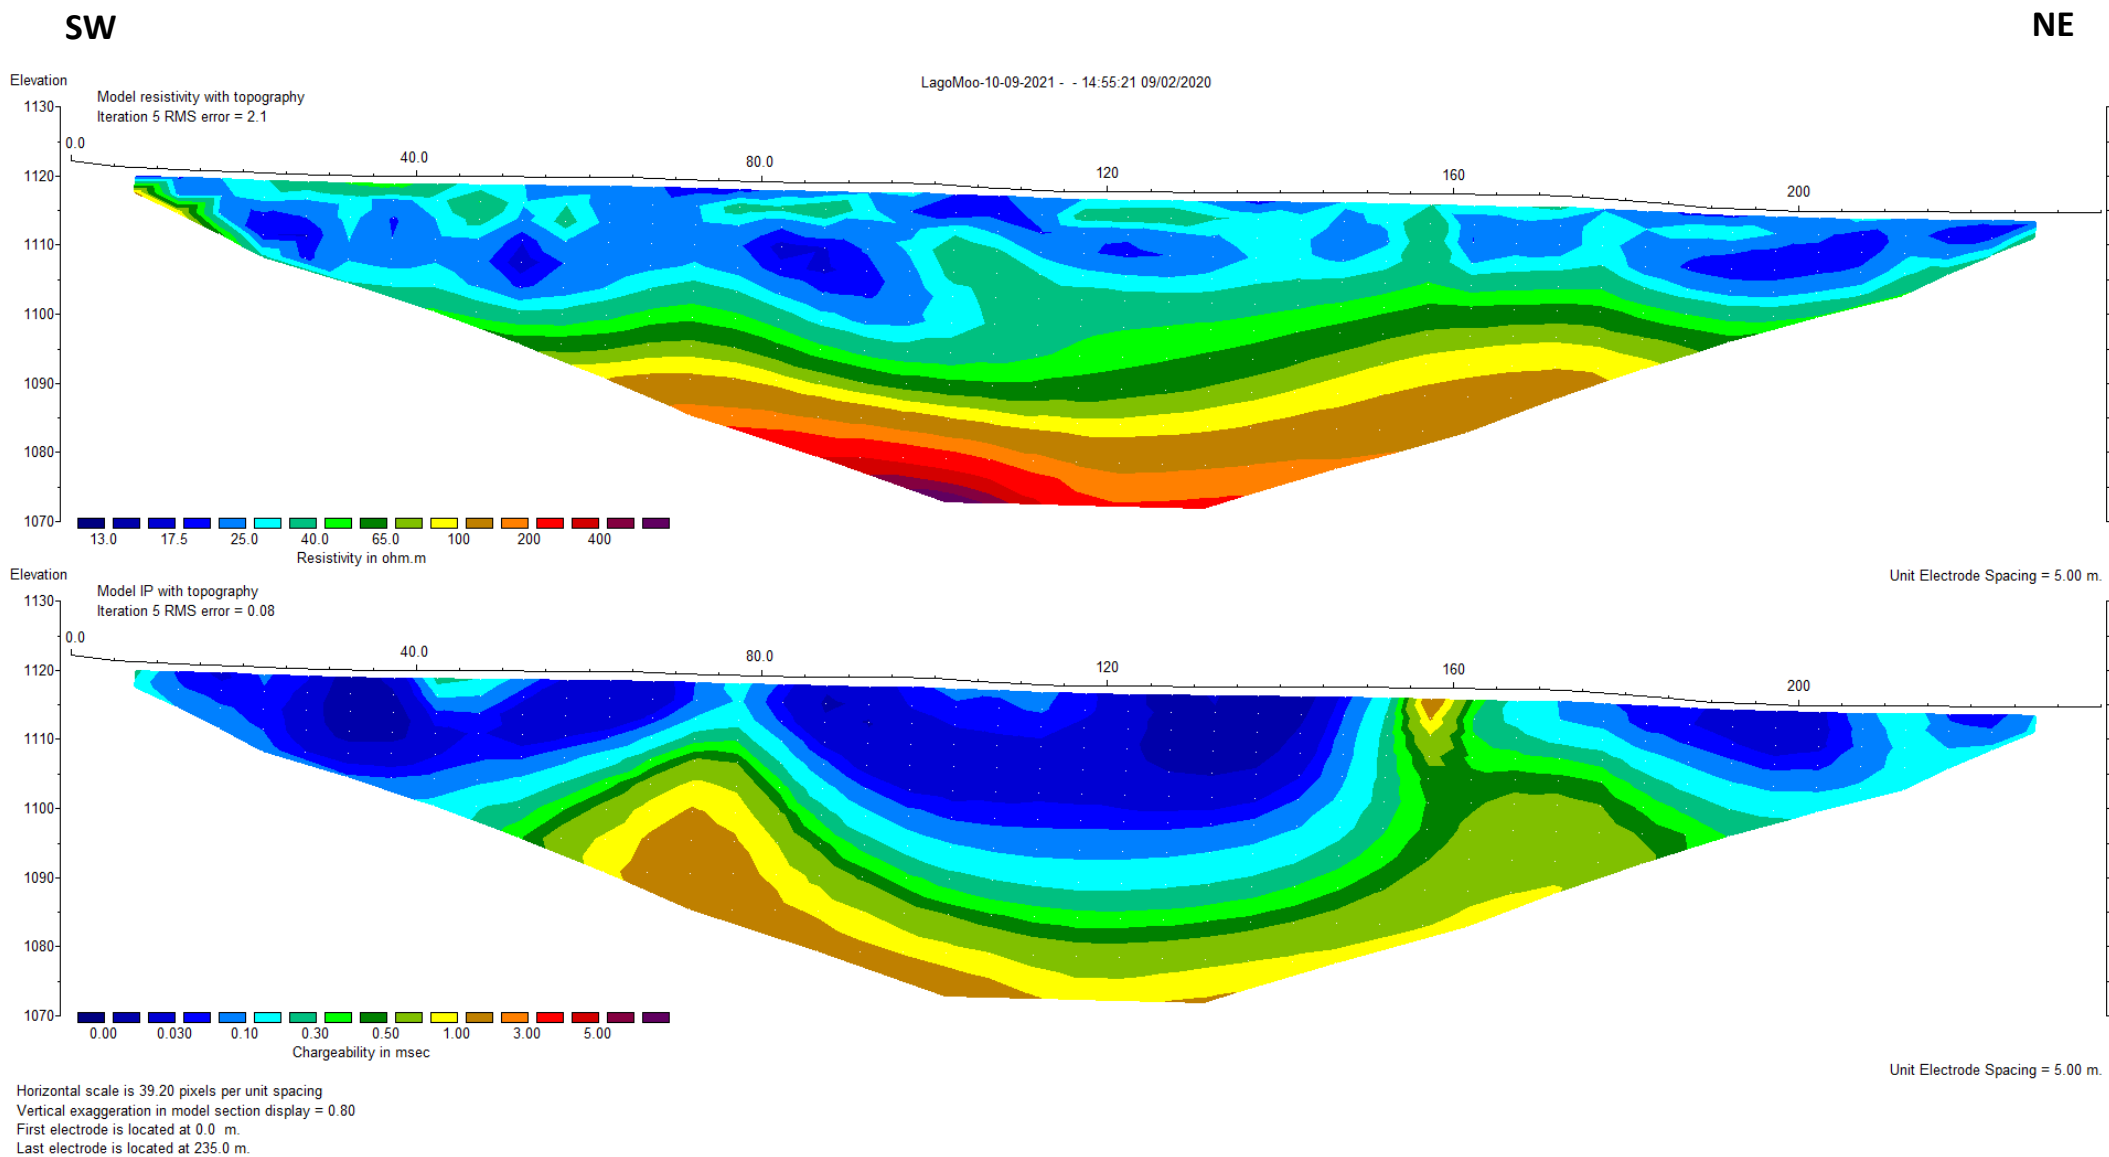

**Figure S11.** ERT L1 Comparison between resistivity and chargeability



Figure S12. ERT L1 Comparison between resistivity and chargeability and interpretation

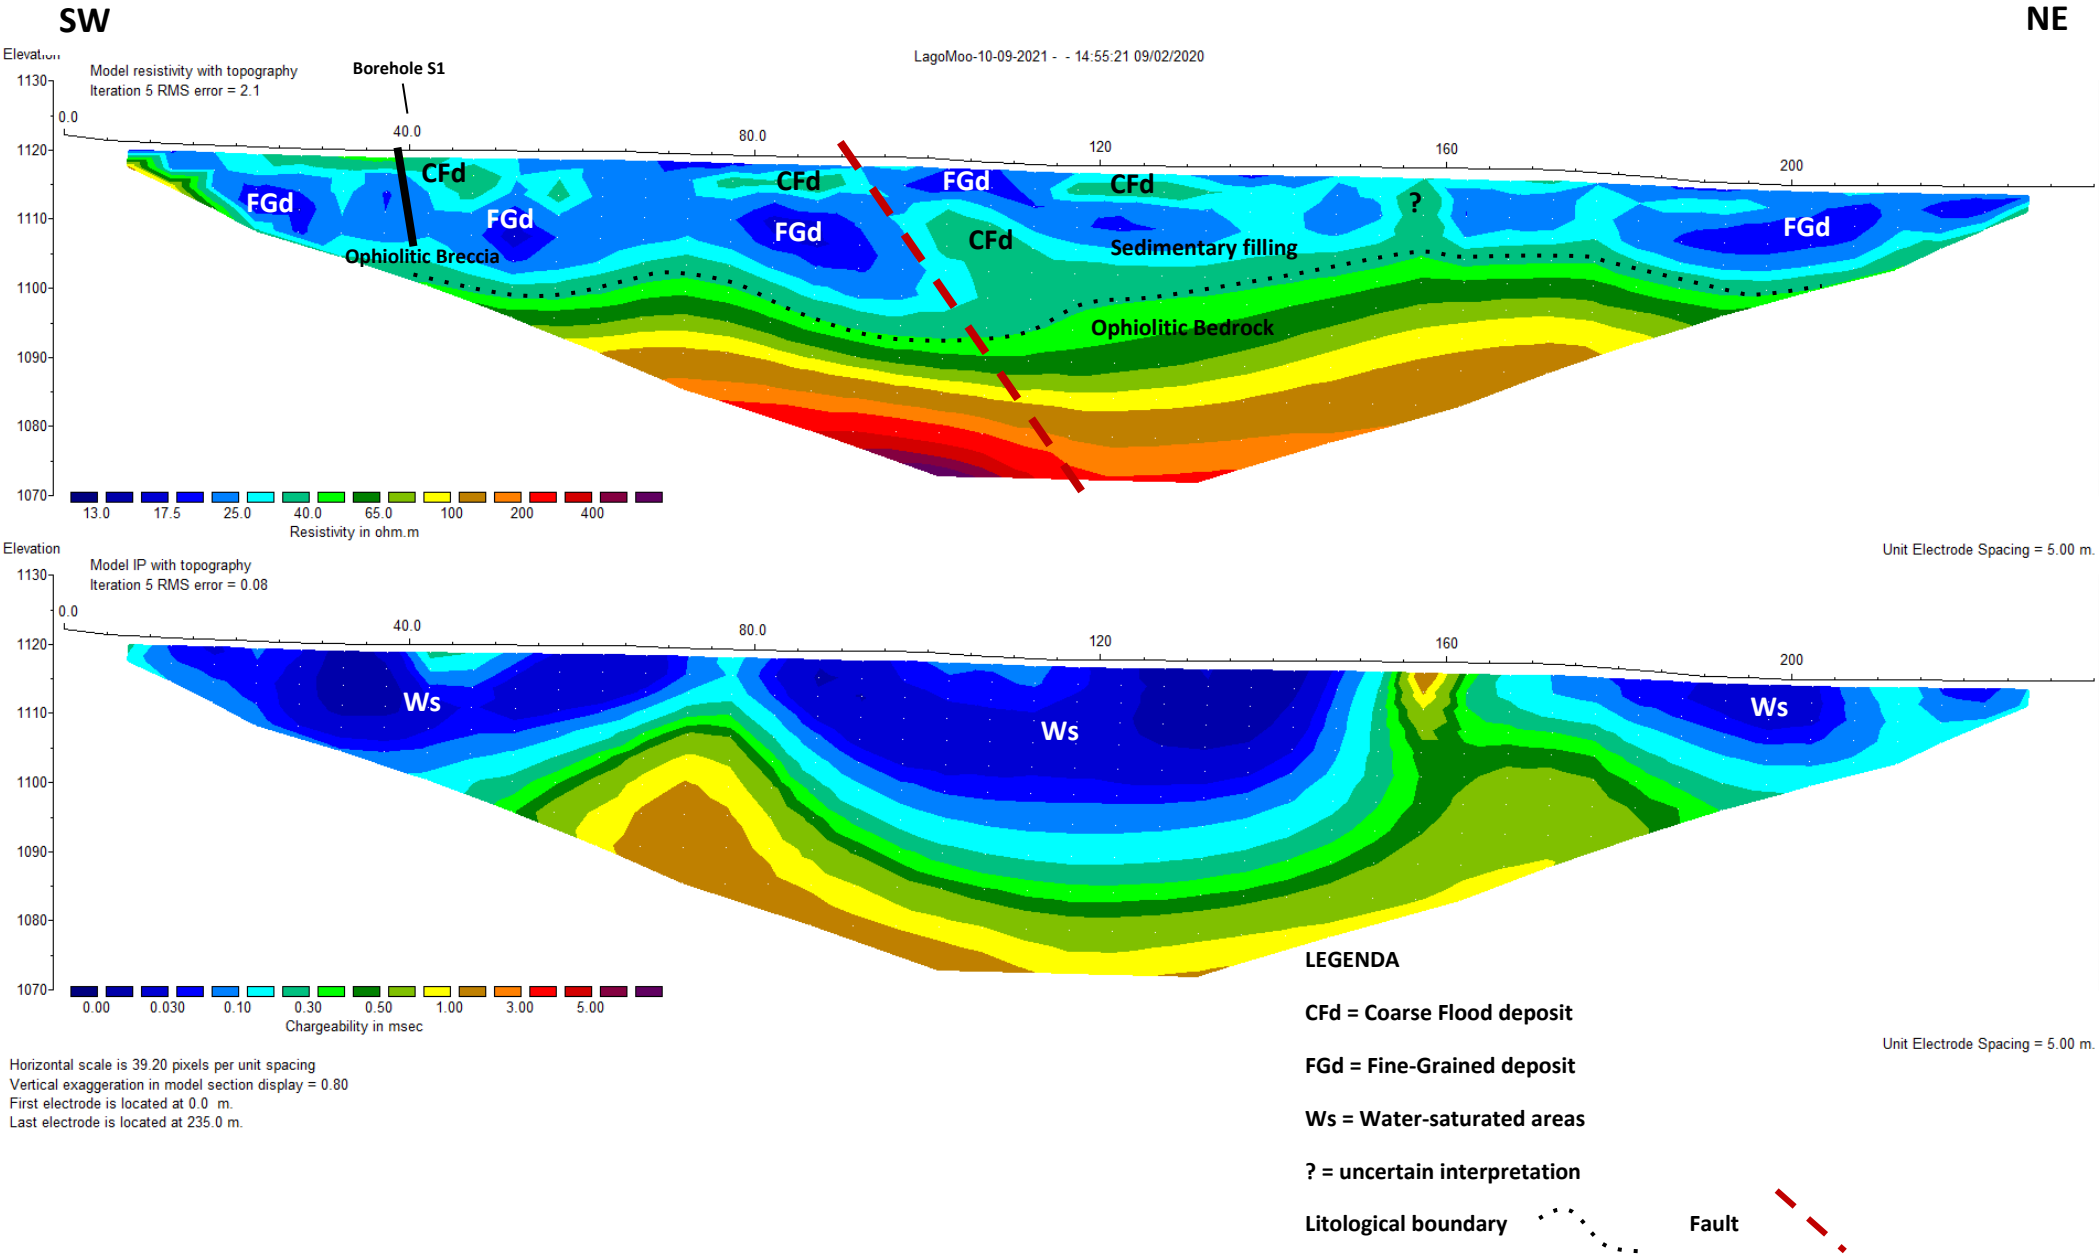

Chapter 2: T1 and T2 undisturbed sediment cores

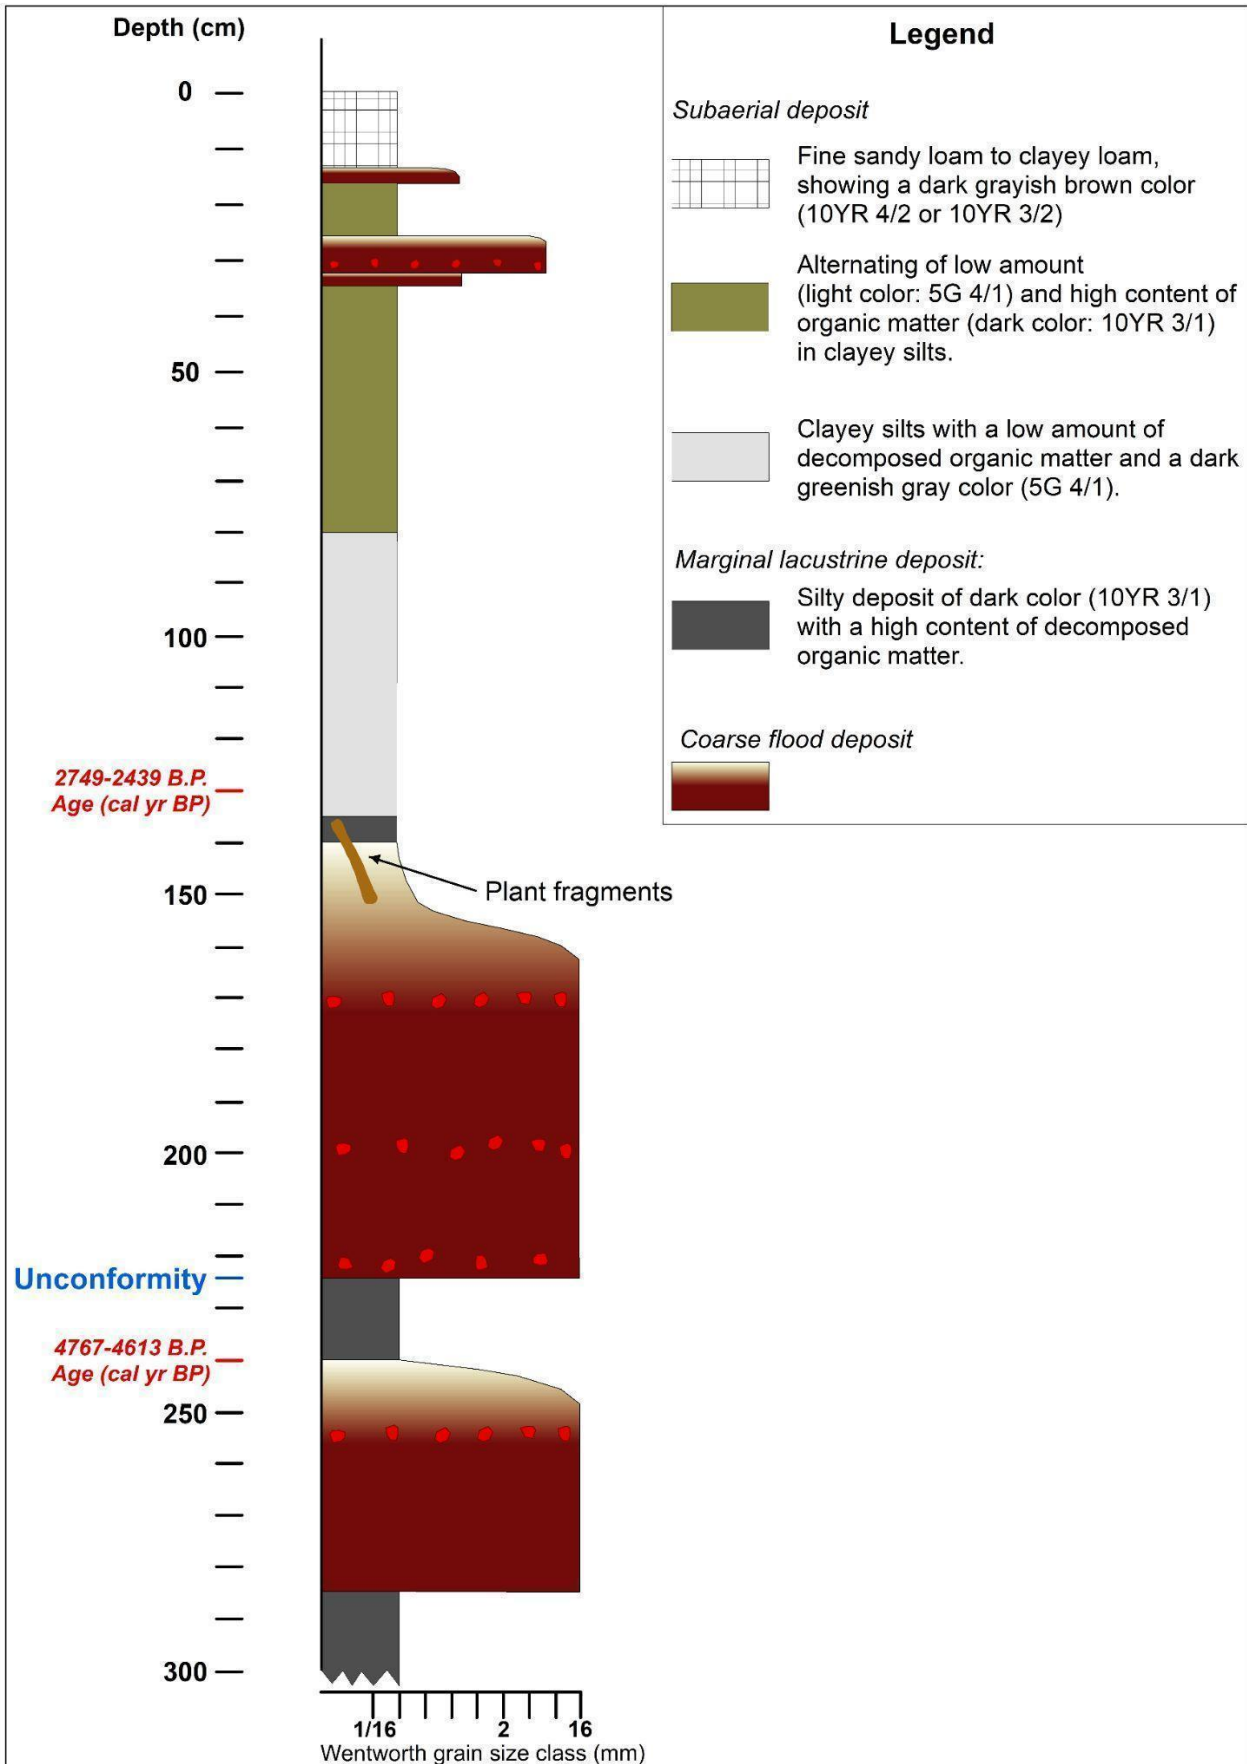

Figure S13. T1 core: main sedimentological features and lithofacies characterization.

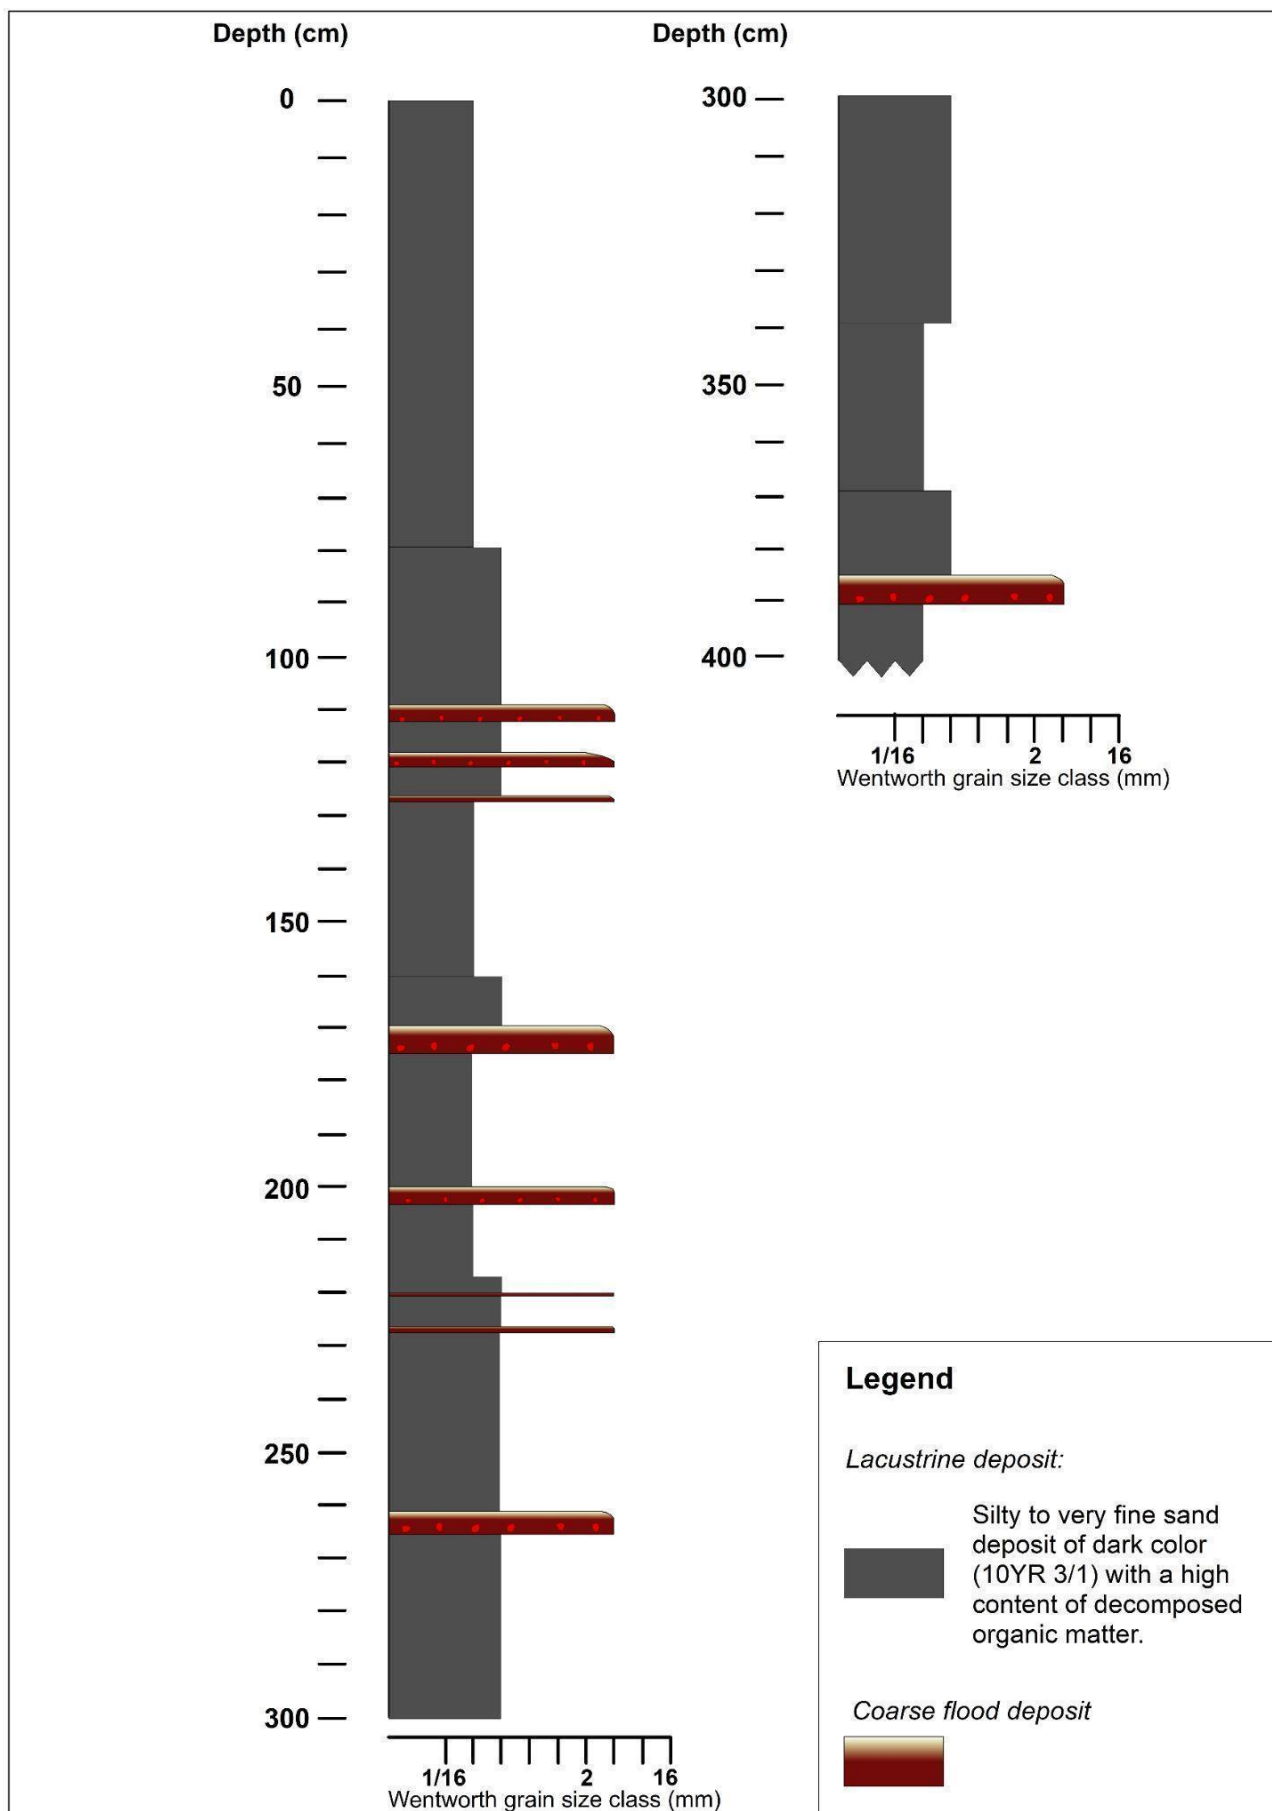

**Figure S14.** T2 core: main sedimentological features and lithofacies characterization.



Chapter 3: Radiocarbon data analysis T1

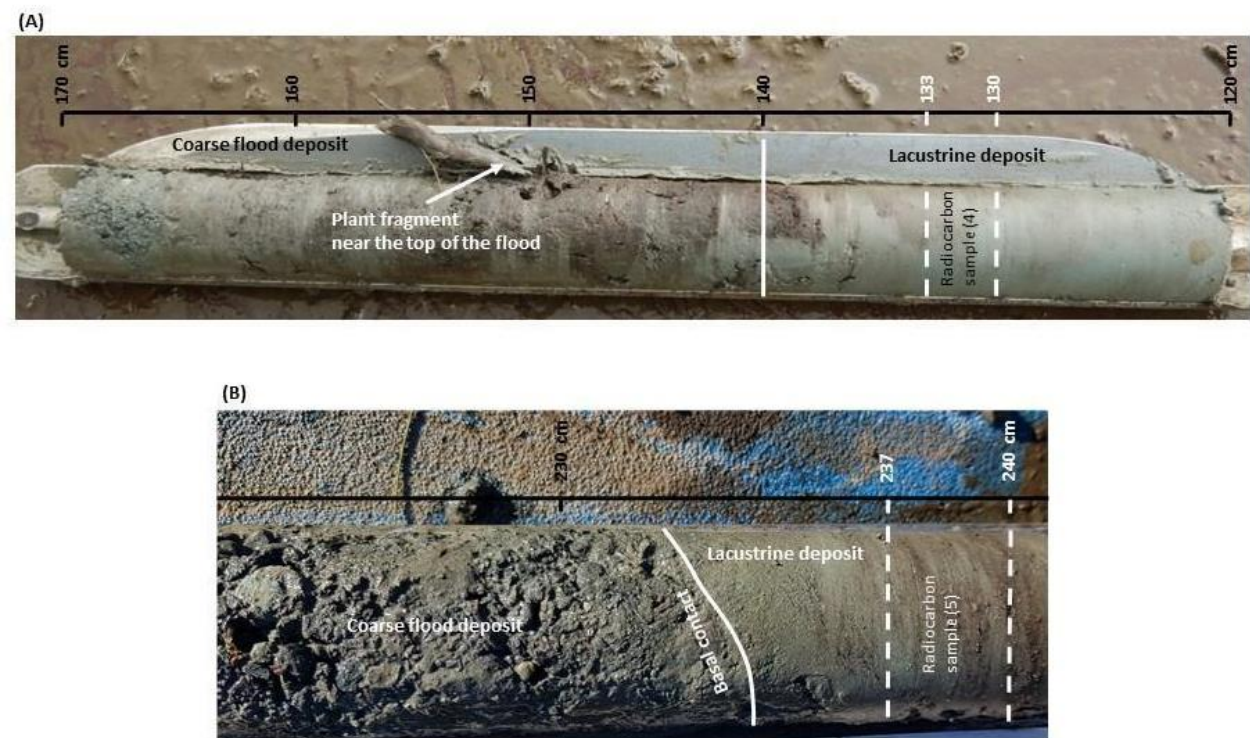

**Figure S15.** T1 core: position of the sampled at the depth between 130-133 cm for radiocarbon dating (A) and between 237-240 cm (B).

| Label code | T1 core code | Core depth (cm) | Material      | Conventional age (year B.P.) | Calibrated age B.P. ( ±2sigma) | Calibrated range BC/AD (±2 sigma)                         |
|------------|--------------|-----------------|---------------|------------------------------|--------------------------------|-----------------------------------------------------------|
| LTL20417A  | 4            | 130-133         | Peaty deposit | 2516±45                      | 2749-2439                      | 799BC (95.4%)<br>489BC                                    |
| LTL20418A  | 5            | 237-240         | Peaty deposit | 4213±45                      | 4767-4613                      | 2907BC (32.4%)<br>2833 BC<br><br>2817BC (63.0%)<br>2663BC |

**Table S2.** Full list of Radiocarbon sample age and description details.

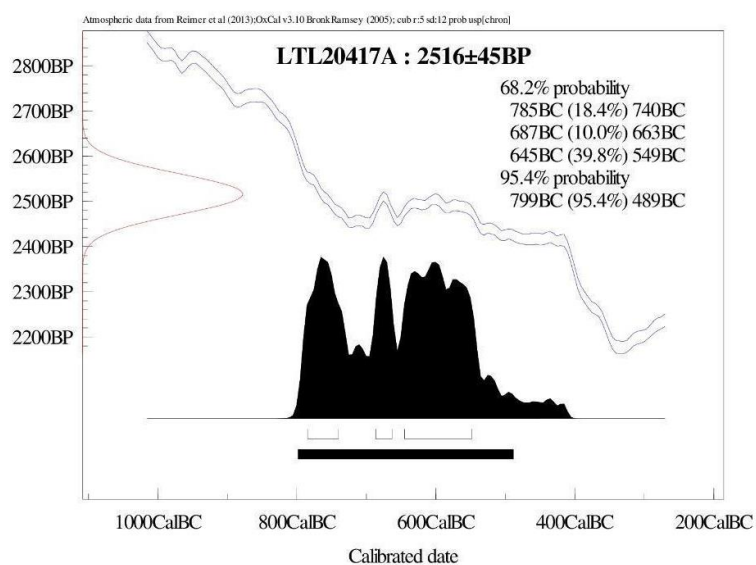

Calibrazione della data convenzionale al radiocarbonio del campione LTL20417A, Pian Vallese, T1, camp. 5, 130-133 cm.

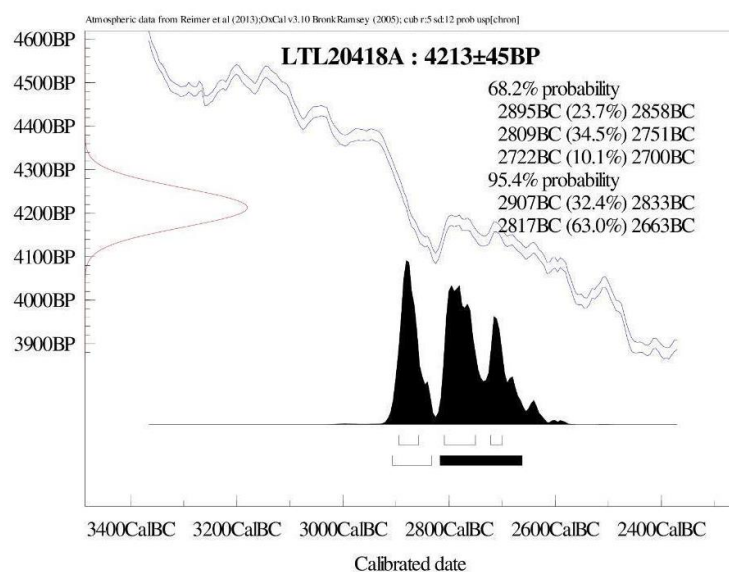

**Figure S16.** Calibration of the conventional radiocarbon date of samples LTL20417A and LTL20418A.
